# Supplementary material for: Evaluation of Antimicrobial Activity and Cytotoxicity Effects of Extracts of Piper nigrum L. and Piperine
Source: MDPI journal article supplement (doi:10.3390/separations10010021), 2022-12-30
Supplement: s1 [file s1]

Archive with 1 entries (1 files):
- separations-1981409-supplementary.pdf
